2 **Title: The dengue virus NS1 protein conveys pro-inflammatory**  
3 **signals by docking onto human high-density lipoproteins**

4  
5 **Authors:** Souheyla Benfrid<sup>1,2,#,\*</sup>, Kyu-Ho Park<sup>1,#,\*</sup>, Mariano Dellarole<sup>1,#</sup>, James E. Voss<sup>1,#</sup>,  
6 Carole Tamietti<sup>1</sup>, Gérard Pehau-Arnaudet<sup>3</sup>, Bertrand Raynal<sup>4</sup>, Sébastien Brûlé<sup>4</sup>, Patrick  
7 England<sup>4</sup>, Xiaokang Zhang<sup>1,#</sup>, Anastassia Mikhailova<sup>5,#</sup>, Marie-Noëlle Ungeheuer<sup>6</sup>, Stéphane  
8 Petres<sup>7</sup>, Scott B. Biering<sup>8</sup>, Eva Harris<sup>8</sup>, Anavaj Sakunthabai<sup>9</sup>, Philippe Buchy<sup>10,#</sup>, Veasna  
9 Duong<sup>10</sup>, Philippe Dussart<sup>10</sup>, Fasséli Coulibaly<sup>11</sup>, François Bontems<sup>1,12</sup>, Félix A. Rey<sup>1</sup>, Marie  
10 Flamand<sup>1,†</sup>

11  
12 **Affiliations:**

13 <sup>1</sup>Unité de Virologie Structurale, Institut Pasteur and CNRS UMR3569, 25-28 rue du Docteur Roux,  
14 75724 Paris, France

15 <sup>2</sup>Université Paris Descartes Sorbonne Paris Cité, France

16 <sup>3</sup>UTECH UBI, Institut Pasteur and CNRS UMR 3528, 28 rue du Docteur Roux, 75015 Paris, France

17 <sup>4</sup>Molecular Biophysics Facility, Institut Pasteur, CNRS UMR 3528, 25 rue du Docteur Roux, 75724  
18 Paris, France

19 <sup>5</sup>HIV Inflammation et Persistance, Institut Pasteur, 28 rue du Docteur Roux, 75724 Paris, France

20 <sup>6</sup>ICAReB, Institut Pasteur, 28 rue du Docteur Roux, 75724 Paris, France

21 <sup>7</sup>Production and Purification of Recombinant Proteins Facility, Institut Pasteur, 28 rue du Docteur  
22 Roux, 75724 Paris, France

23 <sup>8</sup>Division of Infectious Diseases and Vaccinology, School of Public Health, University of California,  
24 Berkeley, Berkeley, CA, USA

25 <sup>9</sup>Human Genetics, Institut Pasteur, 25 rue du Docteur Roux, 75724 Paris, France

26 <sup>10</sup>Virology Unit, Institut Pasteur du Cambodge, Institut Pasteur International Network, 5 Monivong  
27 Boulevard, PO Box 983, Phnom Penh, Cambodia

28 <sup>11</sup>Department of Biochemistry and Molecular Biology, Monash University, Clayton, 3800, Australia

29 <sup>12</sup>Département de Biologie et Chimie Structurales, Institut de Chimie des Substances Naturelles,  
30 CNRS UPR2301, Gif-sur-Yvette, France

31 #Present addresses: Université Paris-Est, Laboratoire de Santé Animale, ANSES, INRA, ENVA, UMR  
32 1161 Virologie, 94700, Maisons-Alfort, France (SB); Applied Molecular Virology, Institut Pasteur  
33 Korea, Seongnam-si, Gyeonggi-do, Rep. of Korea (KHP); Virus Biophysics Laboratory,  
34 Bionanosciences Research Center (CIBION), National Scientific and Technical Research Council  
35 (CONICET), Godoy Cruz 2390, C1425FQD Ciudad Autónoma de Buenos Aires, Argentina (MD);  
36 Department of Immunology and Microbiology, The Scripps Research Institute, La Jolla, CA 92037,  
37 USA (JV); Guangdong Provincial Key Laboratory of Brain Connectome and Behavior, CAS Key  
38 Laboratory of Brain Connectome and Manipulation, the Brain Cognition and Brain Disease Institute  
39 (BCBDI), Shenzhen Institutes of Advanced Technology, Chinese Academy of Sciences; Shenzhen-  
40 Hong Kong Institute of Brain Science-Shenzhen Fundamental Research Institutions, Shenzhen,  
41 518055, China (XZ); Division of Molecular Neurobiology, Department of Medical Biochemistry and  
42 Biophysics, Karolinska Institute, Stockholm, Sweden (AM); GlaxoSmithKline Vaccines R&D,  
43 Singapore (PB)

44

45 \*These authors contributed equally to this work

46 †Correspondence to: Marie Flamand ([marie.flamand@pasteur.fr](mailto:marie.flamand@pasteur.fr))

47

48     **ABSTRACT**

49     The nonstructural NS1 protein is a virulence factor secreted by dengue virus (DENV)-infected  
50     cells. NS1 is known to alter the complement system, activate immune cells and perturb  
51     endothelial barriers. Here we show that pro-inflammatory signals are triggered by a high  
52     affinity complex formed between NS1 and human high-density lipoproteins (HDL).  
53     Electron microscopy images of the NS1-HDL complexes show spherical HDL particles with  
54     rod-shaped NS1 protrusions on their surface. These complexes are readily detectable in the  
55     plasma of hospitalized dengue patients using anti-apolipoprotein A-I (ApoA-I) antibodies  
56     specific of the HDL moiety. The functional reprogramming of HDL particles by the NS1  
57     protein as a means to exacerbate systemic inflammation during DENV infection provides a  
58     new paradigm linking the human lipoprotein network to dengue pathogenesis.

59

60

61

62

63     **Short title:** DENV NS1 forms pro-inflammatory complexes with HDL

64

## 65 INTRODUCTION

66 Dengue virus (DENV) infects nearly 400 million people annually, leading to more than  
67 500,000 hospitalizations (1, 2). The mortality rate varies from less than 1% to 10% depending  
68 on the epidemic and medical care provided to patients (« Dengue and Severe Dengue » s. d.  
69 WHO, 2016, (3)). The dengue nonstructural protein 1 (NS1) is a viral effector circulating in  
70 the bloodstream of DENV-infected patients (reviewed in (4-6)). In DENV-infected cells, NS1  
71 forms amphipathic dimers in the endoplasmic reticulum (ER) that insert into the luminal side  
72 of the membrane (7-9). The membrane-bound dimers play an essential role in orchestrating  
73 viral replication in specialized subcellular factories (10). A sub-fraction of NS1 dimers further  
74 associate by three to form barrel-shaped hexamers. During this process, NS1 hexamers detach  
75 from the ER membrane and are secreted as soluble nanoparticles loaded with lipids from the  
76 infected cell (11, 12). The secreted form of NS1 has previously been shown to bind to  
77 complement and coagulation factors, to activate immune and endothelial cells, to trigger the  
78 expression of pro-inflammatory cytokines, to alter the glycocalyx barrier and to promote  
79 endothelium permeability (13-18). The antibody response against NS1 has been shown to  
80 protect against several flavivirus infections (14, 19-22) but can also be harmful *via* a cross-  
81 reaction with platelets and endothelial cell surface antigens (23-28). These characteristics  
82 altogether favor the development of thrombocytopenia, vascular leakage and hemorrhage.  
83 Given the growing evidence of NS1 involvement in dengue pathogenesis, a better  
84 understanding of the molecular fate of NS1 in extracellular fluids by identifying its interacting  
85 partners is of utmost importance.

86  
87 In the present study, we report that NS1 from dengue virus serotype 2 (DENV-2) binds high-  
88 density lipoproteins (HDL) and with a lower affinity low-density lipoproteins (LDL). HDL  
89 and LDL are lipoprotein complexes composed of large lipid cargos enwrapped by the

90 apolipoproteins A-I and B, respectively, as well as a panel of functional proteins recently  
91 identified by proteomic approaches (29, 30). Lipoprotein particles that circulate in the blood  
92 have long been recognized for their regulatory functions in vascular homeostasis,  
93 inflammation and innate immune responses (29, 31-34). We explored the NS1-HDL  
94 association by biophysical methods and visualized the complex by electron microscopy. Our  
95 observations revealed a stable anchoring of NS1 amphipathic dimers to the HDL surface. We  
96 observed that the NS1-HDL complex could trigger the production of pro-inflammatory  
97 cytokines in exposed human primary macrophages. In addition, we consistently detected  
98 elevated levels of NS1-HDL complexes in the blood of DENV-infected patients on the day  
99 of admission to hospital using an anti-apolipoprotein A-I (ApoA-I) detection assay.  
100 We further determined that NS1 complexes acquired an apolipoprotein E (ApoE)-positive  
101 phenotype during the clinical phase, a component mostly found on very-low-density  
102 lipoproteins or chylomicrons and only transiently associated to HDL or LDL. This pointed to  
103 a complex and dynamic interaction of NS1 with the host lipoprotein metabolic cycle.

104

## 105 **RESULTS**

### 106 **The DENV-2 NS1 hexamer binds high- and low-density lipoprotein particles**

107 In this study, we first sought to identify NS1 protein partners encountered during its  
108 circulation in human blood. For this purpose, we carried out a pull-down assay using a  
109 purified preparation of recombinant strep-tagged DENV2 NS1 spiked in plasma obtained  
110 from healthy donors to pull down potential ligands. We thus re-affinity purified NS1 from the  
111 plasma and analyzed the resulting products by size exclusion chromatography (SEC) (Fig.  
112 1A). Compared to NS1 alone, the pull-down SEC profile showed an additional peak and a  
113 large shoulder at smaller elution volumes, corresponding to apparent molecular weights of

114 840 and 380 kDa, respectively (Fig. 1A). The protein contents of the two high molecular  
115 weight complexes were analyzed by SDS-PAGE and the identities of the predominant protein  
116 bands determined by N-terminal sequencing and mass spectrometry as ApoA-I and ApoB.  
117 These proteins correspond to the main scaffold proteins of HDL and LDL, respectively (Fig.  
118 1A).

119 This observation prompted us to assess the affinity of DENV2 NS1 for HDL and LDL.  
120 We immobilized human HDL and LDL particles on bio-layer interferometry (BLI) sensors  
121 coated with specific polyclonal antibodies against ApoA-I or ApoB, respectively. Figure 1B  
122 displays the binding curves for increasing NS1 concentrations in contact with both types of  
123 lipoprotein particles, and the values reached at steady state. The curves can be fitted using a  
124 single state binding model leading to a relative binding constant ( $K_d$ ) of  $63 \text{ nM} \pm 0.2 \text{ nM}$   
125 for HDL and  $1.4 \text{ } \mu\text{M} \pm 0.1 \text{ } \mu\text{M}$  for LDL (Fig. 1B), indicating preferential binding of NS1 to  
126 HDL compared to LDL.

127 In order to characterize the architecture of the complex, we used analytical ultracentrifugation  
128 to study the behavior of NS1, HDL and a mix of NS1 and HDL at either a 1:1 or 5:1 mass  
129 ratio, which represents approximately a 0.5:1 or 2.3:1 NS1 hexamer to HDL molar ratio (Fig.  
130 1C). Purified NS1 sedimented as a main species with a sedimentation coefficient of 7.9 S  
131 compatible with a globular hexamer. HDL particles exhibited a much lower value of 4.20 S  
132 in keeping with the larger lipid to protein ratio (35). In the sample containing an excess of  
133 NS1 mixed with HDL, all the HDL was engaged in an interaction with NS1 forming a unique  
134 species with a sedimentation coefficient of 16.8 S that segregated distinctly from the other  
135 species (Fig. 1C). Residual unbound NS1 hexamer could still be observed, as expected due to  
136 the NS1 excess (Fig. 1C). By combining two detectors and taking into account the theoretical  
137 composition of the HDL particles, we estimated that one NS1 hexamer was bound to each  
138 HDL particle when present in excess. Interestingly, in the 1:1 ratio sample, we detected

139 intermediate peaks at 9.4 and 11.7S that corresponded to one or two NS1 dimeric subunits  
140 bound to HDL, respectively.

141  
142 **Binding of the NS1 hexamer to spherical HDL leads to a surface rearrangement of NS1**  
143 **into dimeric rod-shaped protrusions**

144 Based on the above results, we used a 2:1 molar ratio to prepare NS1-HDL complexes and  
145 examined the resulting products by negative stain electron microscopy (EM). As previously  
146 shown (36), human HDL particles appear as smooth spheres  $\simeq 10$  nm in diameter with an  
147 electron-dense central region (Fig. 2A). The purified NS1-HDL complexes, in contrast,  
148 presented a granular surface with prominent structures on their outer surface (Fig. 2B).  
149 2D class averages of NS1-HDL complexes revealed that the HDL particles were crowned  
150 with high-density features that match very well the contour of NS1 dimers in side view with  
151 two discrete nodules that likely correspond to the NS1 protomers (Fig. 2B, 2C) (7-9). About  
152 60% of the complexes analyzed in our study presented three NS1 dimers on the HDL surface,  
153 suggesting that NS1 hexamers dissociate into dimers upon binding to HDL particles (Fig. 2B,  
154 2C). Around 25% and 10% of the particles presented 2 or 4 apparent NS1 dimers at their  
155 surface, respectively. These observations corroborate the ultracentrifugation data showing  
156 different ratios of NS1 dimers per HDL particle depending on the initial NS1:HDL ratio (Fig.  
157 1C) and suggest a dynamic binding mode between NS1 and HDL particles.

158 The presence of NS1 dimeric subunits associated to HDL was also evidenced by DSC  
159 (Fig. 2D). Thermal scanning of both hexameric NS1 and the NS1:HDL mix (at a 2:1 molar  
160 ratio) showed two transitions phases while the HDL particles alone did not contribute to any  
161 signal in the scanned temperature range (Fig. 2D) (37). The second transition at a  $T_m$  of 81°C  
162 was identical for NS1 alone and in complex with HDL. We have previously reported that the  
163 NS1 dimer of Japanese encephalitis virus requires temperatures higher than 80°C to dissociate

164 into monomers (38). We therefore attributed this second transition to the dissociation and full  
165 denaturation of NS1 dimeric subunits (Fig. 2D). Accordingly, the first transition peak  
166 corresponds to the dissociation of NS1 hexamers into dimers for NS1 alone ( $T_m$  of 59°C) and  
167 to the release of NS1 dimers from the HDL particle for the NS1-HDL mix ( $T_m$  of 67°C) (Fig.  
168 2D). The difference in  $T_m$  values observed for the first transition peak in both samples  
169 provides additional evidence that once the NS1-HDL complex formed, the NS1 dimer-dimer  
170 interface initially present in the hexamer is converted into a more stable interface formed  
171 between the NS1 dimers and the HDL surface.

### 172

173 **The NS1-HDL complex triggers pro-inflammatory signals in human primary**  
174 **macrophages**

175 NS1 is known to trigger the production of pro-inflammatory cytokines in macrophages (15).  
176 As HDL are potent modulators of inflammation (31, 32), we characterized the cytokine and  
177 chemokine production pattern in human macrophages exposed to NS1 alone, HDL alone or  
178 to the NS1-HDL complex (Fig. 3B). Primary macrophages were differentiated from isolated  
179 monocytes of various donors and stimulated with the different combinations of effectors.  
180 When exposed to NS1 or HDL alone, we observed no significant difference in the cytokine  
181 levels produced by macrophages compared to the negative control, whereas the bacterial  
182 lipopolysaccharide (LPS) consistently induced high levels of cytokine secretion (Fig. 3B).  
183 These observations rule out any cytotoxic effect from putative contaminants in the NS1 and  
184 HDL samples. In contrast, the NS1-HDL mix induced a significant increase in TNF- $\alpha$ , IL-6  
185 and IL-10 secretion, and to a lesser extent IL-1 $\beta$ , compared to NS1 alone. The differences were  
186 even higher when compared with HDL alone, suggesting that NS1 converts HDL into pro-  
187 inflammatory signaling particles (Fig. 3B).



189 **NS1-HDL complexes are detected in hospitalized patients**

190 Knowing that the concentration of the above-mentioned cytokines and chemokines is  
191 dramatically increased in patients with severe dengue (39-42), we assessed the presence of  
192 NS1-HDL complexes in DENV-infected patients. To this end, we developed an additional  
193 ELISA format to broadly detect and quantify NS1-lipoprotein complexes in human plasma.  
194 In addition to our original NS1 detection assay (43, 44) and to the NS1-HDL semi-quantitative  
195 ELISA (Supplementary Fig. 1A,1B), we used an anti-ApoE PAb for the secondary detection  
196 of NS1 complexes potentially formed with the various types of lipoprotein particles (VLDL,  
197 IDL, chylomicrons in addition to HDL and LDL, as reviewed in (45, 46)) (Supplementary  
198 Fig. 1C). Using the three different ELISA formats, we tested blood samples from 51 dengue  
199 patients starting on the day of admission to hospital until their discharge. This represented on  
200 average a time lag of 4.3 days between the first and last samples. The vast majority of patients  
201 (around 80%) showed significantly elevated NS1 and NS1-HDL in blood on the day of  
202 admission compared to the last sample (Fig. 3C). The highest levels were observed between  
203 day 2 and day 4 post-onset of fever (Fig. 3C). By contrast, concentrations of NS1-ApoE-  
204 positive lipoprotein particles increased over time and were highest when tested on the last  
205 blood specimen recovered at the time of discharge from hospital (Fig. 3C). At this stage, we  
206 do not know whether the NS1-HDL complex recruits the exchangeable ApoE as a maturation  
207 or recycling process or whether, once the HDL pool becomes exhausted, the NS1 protein still  
208 expressed binds to other types of lipoprotein particles. In any case, our data clearly show a  
209 transition in the nature of the complexes formed between NS1 and the host lipoproteins during  
210 the course of infection.

211

## 212 **DISCUSSION**

213 Dengue virus nonstructural protein 1 is a viral virulence factor that contributes to the  
214 development of severe dengue, characterized by cytokine storm, thrombocytopenia, vascular  
215 leakage and hemorrhage (4-7). NS1 circulates in the blood of infected patients at nanogram  
216 to microgram per ml levels (47-49). We previously described that the secreted hexameric  
217 form of NS1 shuttles a lipid cargo analogous to those carried by plasma lipoproteins,  
218 suggesting a possible interference with the lipoprotein metabolic cycle (12). Herein,  
219 we provide evidence of a direct interaction between NS1 and human HDL characterized by  
220 the ApoA-I scaffold protein, and with LDL identified by the presence of ApoB. The  
221 complexes formed between NS1 and HDL accumulate during the acute phase of the disease  
222 and by the end of the hospitalization period, NS1-lipoprotein complexes acquire an ApoE-  
223 positive phenotype that may be part of the anti-viral response engaged by the host.

224

225 Once bound to an HDL particle, the NS1 hexamer appears to fuse and collapse into NS1  
226 dimeric building blocks that sit on the surface of the lipoprotein particle. It is not clear at this  
227 stage to which extent protein-lipid or protein-protein interactions prevail but both are likely  
228 to be important. Indeed, NS1 dimers are known to have the ability to bind lipid membranes  
229 and liposomes (7-9) and all the candidate protein ligands of NS1 published so far belong to  
230 the HDL proteome (50). These proteins include complement factors C4, C1s, hnRNP C1/C2,  
231 factor H, prothrombin, as well as inhibitory factors of complement clusterin, C5-9 and SC5b-  
232 9 complexes (51-55). NS1 does not necessarily interact with all but it is reasonable to  
233 anticipate that some will favor the association of NS1 with HDL or its stabilization. Proteomic  
234 studies, direct protein-protein interaction assays, the use of synthetic HDL with defined  
235 compositions or alternatively mimetic peptides will be instrumental in delineating the role of  
236 the different NS1 partners in the formation of a biologically relevant NS1-HDL complex.

237  
238 NS1 was previously shown to activate the immune system and impair vascular homeostasis.  
239 NS1 can trigger the production of inflammatory cytokines and chemokines in cell culture and  
240 in immunodeficient mice (14, 16, 56, 57). Our findings demonstrate that the formation of  
241 NS1-HDL particles is a prerequisite for this effector function. The NS1-HDL complex  
242 assembled *in vitro* triggers pro-inflammatory signals in primary human macrophages while  
243 NS1 or HDL alone have no comparable effect. HDL particles are known to have an anti-  
244 inflammatory regulatory function and contribute to the maintenance of vascular integrity  
245 under physiological conditions (29, 31-33). However, it has also been reported that the  
246 recruitment of specific proteins by HDL, such as serum amyloid A (SAA), confers a pro-  
247 inflammatory status to these particles during an acute phase response (58-62). Our working  
248 hypothesis is that NS1 exerts a similar control on HDL during dengue virus infections. This  
249 process could involve the HDL scavenger receptor B1 that has recently been identified as a  
250 cell surface receptor for dengue virus NS1 (Alcalà et al., BioRxiv, under review) allowing its  
251 internalization in many mammalian cell types including macrophages, endothelial cells,  
252 keratinocytes and hepatocytes. An NS1-HDL contribution to the cytokine storm would have  
253 a direct impact on the development of severe dengue as increased levels of TNF $\alpha$ , IL6 and  
254 IL-10 correlate consistently with disease severity and in certain instances endothelium  
255 permeability (63-69).

256  
257 Several studies have described altered levels of HDL, LDL or VLDL in severe dengue (70-  
258 75). It is conceivable that NS1 broadly impacts the lipid and lipoprotein pathways by  
259 reprogramming the signaling patterns of the different lipoprotein particles or modulating the  
260 rate of their metabolic turnover. In this respect, we observed a notable change in the  
261 composition of the NS1-bound lipoprotein particles with the acquisition of an ApoE-positive

262 signature over the course of the disease. ApoE is an exchangeable lipoprotein that can  
263 associate with most lipoprotein particles during the lipid metabolic cycle (45, 46). ApoE has  
264 also been recognized for its anti-inflammatory, anti-oxidative, anti-thrombotic and  
265 endothelial repair related properties (76, 77). The changes we observe emphasize the dynamic  
266 nature of the interaction of NS1 with host lipoproteins. Further studies are now needed to  
267 investigate whether the formation of NS1-ApoE-positive lipoprotein complexes are part of a  
268 recovery mechanism from the host or whether NS1 continues its intoxication program during  
269 the convalescent phase. A number of studies have described a persistence of asthenia for  
270 weeks, extending well beyond the end of the acute clinical phase (78-81).

271  
272 In conclusion, we find that the secreted form of DENV protein NS1 hijacks HDL from human  
273 serum, and possibly other lipoprotein particles such as LDL, to form a pro-inflammatory NS1-  
274 HDL lipoprotein complex. Our data further suggest the occurrence of a structural transition  
275 of NS1 on the surface of HDL that results in the collapse of NS1 hexamers and the anchoring  
276 of amphipathic dimeric subunits in the HDL lipid phase. Finally, we demonstrate the presence  
277 of NS1-HDL complexes in the sera of dengue patients during the acute phase of the disease.  
278 The capture of HDL by NS1 may represent a way for the virus to exacerbate systemic  
279 inflammation. This will affect vascular permeability and facilitate virus propagation in the  
280 infected organism. Unraveling the molecular mechanisms governing the assembly of the  
281 NS1-HDL complex, its metabolic fate and pathogenic functions will be critical in defining  
282 preventive measures against the active form of DENV NS1.

283

## 284 **MATERIALS AND METHODS**

### 285 **DENV-2 NS1 protein expression, purification and serum pull-down experiments**

286 The DENV-2 recombinant NS1 protein was expressed in drosophila S2 cells and purified  
287 from the extracellular medium as detailed in the previously published supplementary methods  
288 (12). Purified DENV-2 recombinant NS1 protein was incubated for 1h at 37°C in serum or  
289 plasma recovered from a healthy donor (provided by the ICAReB facility, Institut Pasteur) at  
290 a final concentration of 400 µg NS1/mL plasma. The mix was then purified on a Strep-tactin  
291 column (Iba), washed twice with PBS Mg<sup>2+</sup>/Ca<sup>2+</sup> (Gibco) followed by 14 column volumes of  
292 PBS 0.3 M NaCl and another 5 column volumes of PBS Mg<sup>2+</sup>/Ca<sup>2+</sup>. Elution was performed  
293 using 2.5 mM D-desthobiotine (Iba) in PBS Mg<sup>2+</sup>/Ca<sup>2+</sup>.

294 Purified samples of recombinant NS1, human HDL (Millipore), human LDLs (Millipore) or  
295 an *in vitro* reconstituted NS1-HDL mix were analyzed by size exclusion chromatography on  
296 a Superdex 200 10/300 column (GE healthcare). Protein standards from Bio-Rad were used  
297 to interpret elution profiles. The protein samples from the major peaks were further  
298 denatured in 5x Laemmli sample buffer containing β-mercaptoethanol, boiled for 5 min at 95  
299 °C and separated by discontinuous sodium dodecyl sulfate (SDS) 4-15% polyacrylamide gel  
300 electrophoresis (SDS-PAGE precast gels, Bio-Rad). The SDS-PAGE gels were stained in  
301 Coomassie Blue solution (Bio-Rad).

302

### 303 **Biolayer Interferometry**

304 DENV2 NS1 binding to HDL and LDL particles was monitored by Biolayer Interferometry  
305 (BLI), using an Octet Red384 instrument (ForteBio). Streptavidin-coated biosensors (SA,  
306 ForteBio) were loaded with biotinylated anti-ApoA-I or anti Apo-B antibodies (Abcam),

307 followed by HDL or LDL, respectively. Subsequently the biosensors were incubated in wells  
308 containing serial dilutions of NS1 protein (concentrations ranging from 6.25 to 800nM for  
309 HDL, and from 36 to 2500nM for LDL) and the BLI association signals were recorded in  
310 real-time until they reached a plateau. Finally, the biosensors were incubated in wells  
311 containing buffer to monitor the dissociation of the complexes formed, before being  
312 regenerated for further use in replicate experiments. The regeneration protocol, comprising  
313 three subsequent 20 seconds washes in 10 mM Gly-HCl pH2, could be applied up to eight  
314 times for up to two days without losing any loading capacity of the immobilized biotinylated  
315 antibodies. The specific NS1 binding curves were obtained by subtracting the non-specific  
316 signals measured on unloaded biosensors used as control references. The steady-state signals  
317 were determined at the end of the association step and fitted using the following equation:  
318  $Req = Rmax * C / (Kd + C)$  where Req is the steady-state BLI response, C the NS1 concentration,  
319 and Rmax the response at infinite concentration. All measurements were performed at least  
320 three times to determine experimental errors. All experiments were performed at 20°C in PBS  
321  $Mg^{2+}/Ca^{2+}$  (Gibco) supplemented with 0.1% milk to minimize nonspecific binding, using 96-  
322 well half-area plates (Greiner Bio6One) filled with 150 µl per well, and a shaking speed of  
323 1000 rpm. Data was processed using the Scrubber (v2.0 BioLogic), BIAevaluation 4.0  
324 (Biacore) and Profit (Quantumsoft) softwares.

325

### 326 **Analytical ultracentrifugation**

327 NS1, HDL, and NS1-HDL mix at different molar ratios were centrifuged at 32,000 rpm for  
328 the complexes in a XL-I and a new Optima AUC (Beckman Coulter) analytical  
329 ultracentrifuge, at 20 °C in a four-hole AN 50–Ti rotor equipped with 3-mm and 12-mm  
330 double-sector aluminium epoxy centrepieces.

331 Detection of the biomolecule concentration as a function of radial position and time was  
332 performed by absorbance measurements at 250 nm and 280 nm, and by interference detection.  
333 Ultracentrifugation experiments were performed in PBS+/+ (Gibco). Sedimentation velocity  
334 data analysis was performed by continuous size distribution analysis c(s) using the Sedfit 15.0  
335 software (82). All the c(s) distributions were calculated with a fitted fractional ratio  $f/f_0$  and  
336 a maximum entropy regularization procedure with a confidence level of 0.95. Buffer viscosity  
337 and density as well as the extinction coefficient of NS1 were calculated using the sednterp  
338 software (<http://sednterp.unh.edu/>). Partial specific volume were measured for NS1 (0.82  
339 ml.g<sup>-1</sup>, as defined on an iodixanol density gradient) and confirmed by multidetection AUC  
340 experiment for HDL (0.94 ml.g<sup>-1</sup>). Extinction coefficients were extrapolated at 250 nm using  
341 the Utrascan II software. Deconvolution of the multi detectors signal into stoichiometric ratio  
342 was performed by integrating all the peaks on each detector to determine the contribution of  
343 each partner present (NS1, HDL or both).

344

345

#### 346 **Differential scanning calorimetry (DSC)**

347 Thermal unfolding of NS1 and of the NS1-HDL complex were followed using a VP-Capillary  
348 DSC instrument (Malvern MicroCal) in PBS buffer. The concentration of the NS1 hexamer  
349 was 0.2 mg/ml and was used at a 2:1 molar ratio to form the NS1-HDL complex. At least two  
350 DSC scans were recorded for each sample. Human HDL (Merck Millipore) was incubated  
351 with NS1 for 1 hour at 37°C prior to the DSC experiments. Scan rate was 100°C/hr with a  
352 filtering period of 2. Thermograms were analysed with the Origin software provided by the  
353 manufacturer.

354

355 **Electron microscopy and image analysis**

356 Solutions of NS1 and NS1-HDL were spotted on glow discharged carbon grids, contrasted  
357 with 2% uranyl acetate and imaged with a Tecnai F20 microscope (Thermo Fisher, USA) in  
358 low dose conditions. Automated acquisitions were performed using EPU software (Thermo  
359 Fisher, USA) and images were acquired using a Falcon II (Thermo Fisher, USA) direct  
360 detector.

361 HDL and NS1-HDL images were CTF-corrected (phase flip) and sorted using the XMIP  
362 software (83). Corrected images were imported in Relion (84). The recommended strategy  
363 for particle picking was applied as follow: a manual selection of particles compatible with the  
364 HDL or NS1-HDL size was performed on a small number (about fifteen) of images. A 2D  
365 classification (40 classes) was performed and five representative well-defined classes were  
366 selected as template for the automatic picking, leading to about 30 000 particles. A 2D  
367 classification (200 classes) was then performed. Classes obviously corresponding to artefacts  
368 were suppressed and a final run of 2D classification (200 classes) was carried out.

369

370 **Macrophages immune activation assay**

371 Monocytes were isolated from buffy coats and were differentiated into macrophages by using  
372 human AB serum in macrophage medium, as previously described (Allouch et al., PNAS  
373 2013). Briefly, PBMCs were isolated from whole blood using a Ficol gradient centrifugation  
374 (Eurobio). CD14<sup>+</sup> cells are purified by magnetic bead separation of PBMCs using CD14<sup>+</sup>  
375 human positive selection kit (StemCell) and plated 1M cells per ml on teflon plates (Sarstedt)  
376 with 7 ml per plate in the following medium: RPMI-1640 (Gibco), 2 mM L-glutamine  
377 (LifeTechnologies), 1% penicillin-streptomycin of concentration: 10,000 units penicillin and  
378 10 mg streptomycin/ml (LifeTechnologies), 10 mM Na Pyruvate (LifeTechnologies), 10 mM



379 HEPES (LifeTechnologies), 1% MEM vitamins (LifeTechnologies), 1% NEAA  
380 (LifeTechnologies), 50 uM beta-mercaptoethanol (LifeTechnologies), 15% human serum  
381 (ICAREB facility, Institut Pasteur). Monocytes were cultured in differentiating media for 6-8  
382 days after which the macrophages were scraped off Teflon plates and counted. After spinning,  
383 they were resuspended at 1 million/ml in the same media but with 5% FBS instead of human  
384 serum.

385 Macrophages were plated at 0.5 million cells per mL in P24 plates (Corning). After 2 hours  
386 sedimentation and adhesion of the cells, macrophages were incubated with PBS (as negative  
387 control), LPS (100 ng/mL) as positive control, HDL (2.5 µg/mL), NS1 (10 µg/mL) or a NS1-  
388 HDL mix at same respective quantities (2:1 molar ratio) for 24h before collection of the  
389 supernatants. Inflammatory mediators were detected in cell supernatants using a hMagnetic  
390 Luminex Assay 5 Plex, R&D Systems, Bio-Techne Ltd run on the BioPlex 200 System xMAP  
391 (BioRad Laboratories Inc.) as per manufacturer's specifications. The antibody bead kit was  
392 designed to quantify IL-1 $\beta$ , IL-6, IL-10, TNF-alpha. Standards were run with each plate at  
393 every assay to titrate the level of cytokines present. Statistical analyses were performed in  
394 Prism 6.0 (GraphPad Software Inc.) Data are shown as individual points and means  $\pm$  SD.  
395 Significant testing was performed using 2-way ANOVA.

396

### 397 **DENV-infected patient sera specimen**

398 Patients presenting acute dengue-like symptoms – between June and October of 2011 and  
399 2012 – were enrolled at the Kampong Cham Referral Hospital. Inclusion criteria, following  
400 the WHO 1997 classification scheme, were children between 2 and 15 years old who had  
401 fever or history of fever at presentation and onset of at least two of the following symptoms  
402 within the previous 72 hours: headache, retro-orbital pain, muscle pain, joint pain, rash, or

403 any bleeding signs. We performed a prospective, monocentric, cross-sectional study of  
404 hospitalized children with severe and non-severe dengue. The study was approved by the  
405 Cambodian National Ethics Committee for Human Research (approval #087NECHR/2011).  
406 All patient inclusion and blood sampling occurred after obtaining written informed consent  
407 from the patient's parents or guardians. The first visit was conducted at hospital admission.  
408 The day of onset of symptoms was defined as day 0 of the illness. The last visit was performed  
409 at the time of discharge for patients who recovered entirely, or as a follow-up visit for patients  
410 still in the critical phase. A clinical and biological follow-up including abdominal/chest  
411 ultrasound recording was conducted at each visit. DENV infection of hospitalized patients  
412 was confirmed by NS1 antigen detection using our NS1-capture ELISA (47-49) and/or RT-  
413 qPCR and/or virus isolation on *Aedes albopictus* C6/36 cells on the plasma sample obtained  
414 at admission (85). Finally, the severity of the disease among confirmed dengue patients was  
415 assessed according to the WHO 2009 criteria using clinical and biological data recorded at  
416 admission (ADM), follow up visit (F-VIS) or discharge (DIS).

417

#### 418 **Capture ELISA of NS1-HDL complexes**

419 Microtitration plates were coated overnight with purified mouse anti-NS1 monoclonal  
420 antibody. Wells were saturated and washed before serial dilutions of human sera spiked with  
421 purified DENV-2 NS1 or DENV1- or DENV-2-infected human sera were added to wells for  
422 2 h at room temperature. Wells were washed again and incubated for 1 h at 37°C with anti-  
423 ApoA-I goat polyclonal antibodies followed by a peroxidase-conjugated secondary antibody  
424 revealed with a 3,3', 5,5'-tetramethylbenzidine solution. Negative controls were measured  
425 when the reaction was carried out in the absence of antigen. Absorbance values were corrected  
426 by subtracting the mean value of the signals measured for the negative controls.

427 **FIGURE LEGENDS**

428 **Figure 1: DENV NS1 binds preferentially to human high-density lipoproteins**

429 (A) Size exclusion chromatography profile of NS1 pull-down experiments showing a clear  
430 shift after incubation in complete or heat-inactivated human serum (solid and dotted black  
431 lines, respectively) from the same healthy donor compared to the NS1 protein alone  
432 (blue line). NS1 protein partners were identified by SDS-PAGE and N-terminal sequencing  
433 as the Apolipoprotein B scaffold of the low-density lipoproteins (LDL) in the first SEC  
434 elution peak, and the ApoA-I protein scaffold of the high-density lipoproteins (HDL) in the  
435 second elution peak. (B) Biolayer interferometry (BLI) profiles corresponding to the binding  
436 of serial-diluted concentrations of NS1 respectively to human HDL (left panel) and human  
437 LDL (central panel) particles. The concentration-dependence of the steady-state signal  
438 corresponding to the binding of NS1 to HDL (black dots) and LDL (white dots) is shown on  
439 the right hand side panel. (C) Typical sedimentation coefficient distribution of NS1 or human  
440 HDL alone or pre-incubated together (mix of NS1 and HDL at a 1:1 or 5:1 mass ratio)  
441 monitored using an interferometric detector. Peaks were integrated for all the detectors  
442 (interference and absorbance at 280nm). The calculated stoichiometries are indicated for each  
443 peak. Solutions were equilibrated at 20°C for 2h before sedimentation velocity analysis.

444

445

446 **Figure 2: Analysis of NS1-HDL complexes by electron microscopy reveals the presence**  
447 **of NS1 dimers at the surface of HDL particles**

448 (A, B) Electron microscopy observations from left to right: a representative image, followed  
449 by the three most representative classes of purified HDL particles (A) and NS1-HDL  
450 complexes (B). (C) Fitting of the NS1 3D structure of the dimeric form into the most abundant  
451 class of NS1-HDL complexes, suggesting a collapse of the NS1 hexamer into hydrophobic  
452 dimeric blocks that float and anchor into the HDL lipid phase. (D) Differential scanning  
453 calorimetry (DSC) of NS1 alone (blue line) or of an NS1-HDL mix at a 2:1 molar ratio  
454 (orange). Of note, the HDL particles alone did not generate any signal in the temperature  
455 range tested.

456

457

458

459 **Figure 3: The NS1-HDL lipoprotein complex is biologically active in human primary**  
460 **macrophages and is detectable over the clinical phase in DENV-infected patients**

461 (A) The NS1-HDL complex activates the inflammatory cytokine production from human  
462 primary macrophages. After 24h incubation with respective effectors, supernatants of cell  
463 culture were recovered and Luminex assays were performed to quantify the amount of TNF-  
464 alpha, IL-6 and IL-10 released by cells in the extracellular medium. Data represent mean +/-  
465 SEM of three independent experiments obtained using separate cells from four donors. LPS  
466 stimulation was used as a positive control in the presence or absence of HDL and provided  
467 values consistent between experiments. 2-Way analysis of variance (ANOVA) multiple  
468 comparisons were used to assess the statistical significance of differences observed between  
469 mean cytokine levels in culture supernatants between the different conditions. (B) Patients  
470 (n=51) hospitalized in the Kampong Cham Referral Hospital, Cambodia, presented either  
471 dengue with warning signs or severe dengue. A blood sample was recovered for each patient  
472 on the day of admission at hospital and during a follow-up visit that occurred before discharge  
473 from hospital (on average 4 days apart). Both samples were tested for the presence of the NS1  
474 protein (upper panel), the NS1-ApoA-I complex or the NS1-ApoE complex (lower panel,  
475 dark and white dots, respectively) using three different ELISA formats as described in  
476 Supplementary Fig. 1. NS1-ApoA-I complexes are representative of the NS1-HDL particles  
477 in plasma samples. NS1-ApoE may include different types of NS1-lipoprotein complexes as  
478 ApoE is an exchangeable lipoprotein that binds to various types of lipoprotein particles at  
479 different stages of their metabolic cycle.

480

481

482      **ACKNOWLEDGMENTS**

483      The authors gratefully acknowledge the staff of the Kampong Cham Referral Hospital, the  
484      patients and parents who participated in the study, and the Arbovirus Team in the Virology  
485      Unit at the Institut Pasteur du Cambodge who contributed to this study. We acknowledge the  
486      contribution of the ICAReB facility in setting up the recruitment of donors and the acquisition  
487      of blood samples, in particular Gloria Morizot, Bianca Liliana Perlaza, Sophie Chaouche,  
488      Linda Sangari, Céline Chapel, Philippe Esterre and H el ene Laude. We are most grateful to  
489      Christine Girard-Blanc and Evelyne Dufour for their contribution in producing and purifying  
490      the recombinant DENV NS1 protein. We thank M. Nilges and the Equipex CACSICE for  
491      providing the Falcon II direct detector and David Vreesler for his help in acquiring the first  
492      electron microscopy images of the bovine NS1-HDL complex. Finally, we thank Alexandre  
493      Pachot and Karine Kaiser for their support and helpful discussions.

494

495      **Ethics Statement**

496      The study on dengue virus-infected patients was approved by the Cambodian National Ethics  
497      Committee for Human Research (approval #087NECHR/2011). All patient inclusion and  
498      blood sampling occurred after obtaining written informed consent from the patient’s parents  
499      or guardians.

500      Primary monocyte-derived macrophages were isolated from healthy donor blood obtained  
501      from the French blood bank (Etablissement Franais du Sang) as part of a convention with  
502      the Institut Pasteur. In accordance with French law, written informed consent to use the cells  
503      for clinical research was obtained from each donor.

504

505

506 **FUNDING SOURCES**

507 This study benefited from the financial support of the Institut Pasteur ACIP-27-16 (to PD,  
508 VD, MF); the Institut Pasteur Dengue Task Force (to MF); the Institut Pasteur INNOV-44-  
509 19 (to MF); the BioMérieux collaborative program IP/BM-2012 (to MF, AS); the National  
510 Natural Science Foundation of China 31600606 (to XZ); the National Key R&D Program of  
511 China 2016YFA0501100 (to XZ); Guangdong Provincial Key Laboratory of Brain  
512 Connectome and Behavior 2017B030301017 (to XZ); CAS Key Laboratory of Brain  
513 Connectome and Manipulation 2019DP173024 (to XZ); the NIAID/NIH R01 AI24493 (E.H.)  
514 and R21 AI146464 (E.H.).

515

516

517

518 **COMPETING INTERESTS**

519 Dr. Philippe Buchy is a former Head of Virology at Institut Pasteur du Cambodge and is  
520 currently an employee of GSK Vaccines, Singapore.

521

522      **BIBLIOGRAPHY**

- 523      1. S. Bhatt *et al.*, The global distribution and burden of dengue. *Nature* **496**, 504 (Apr 25,  
524      2013).
- 525      2. A. Wilder-Smith, E. E. Ooi, O. Horstick, B. Wills, Dengue. *Lancet* **393**, 350 (Jan 26,  
526      2019).
- 527      3. S. Yacoub, J. Mongkolsapaya, G. Screaton, Recent advances in understanding dengue.  
528      *F1000Res* **5**, (2016).
- 529      4. D. R. Glasner, H. Puerta-Guardo, P. R. Beatty, E. Harris, The Good, the Bad, and the  
530      Shocking: The Multiple Roles of Dengue Virus Nonstructural Protein 1 in Protection and  
531      Pathogenesis. *Annu Rev Virol* **5**, 227 (Sep 29, 2018).
- 532      5. M. Rastogi, N. Sharma, S. K. Singh, Flavivirus NS1: a multifaceted enigmatic viral  
533      protein. *Virology journal* **13**, 131 (Jul 29, 2016).
- 534      6. D. Watterson, N. Modhiran, P. R. Young, The many faces of the flavivirus NS1 protein  
535      offer a multitude of options for inhibitor design. *Antiviral research* **130**, 7 (Jun, 2016).
- 536      7. D. L. Akey, W. C. Brown, J. Jose, R. J. Kuhn, J. L. Smith, Structure-guided insights on  
537      the role of NS1 in flavivirus infection. *Bioessays* **37**, 489 (May, 2015).
- 538      8. B. D. Lindenbach, C. M. Rice, *trans*-Complementation of yellow fever virus NS1 reveals  
539      a role in early RNA replication. *J Virol* **71**, 9608 (1997).
- 540      9. G. Winkler, S. E. Maxwell, C. Ruebmler, V. Stollar, Newly synthesized dengue-2 virus  
541      nonstructural protein NS1 is a soluble protein but becomes partially hydrophobic and  
542      membrane-associated after dimerization. *Virology* **171**, 302 (Jul, 1989).
- 543      10. B. D. Lindenbach, C. M. Rice, Molecular biology of flaviviruses. *Adv Virus Res* **59**, 23  
544      (2003).



- 545 11. M. Flamand *et al.*, Dengue virus type 1 nonstructural glycoprotein NS1 is secreted from  
546 mammalian cells as a soluble hexamer in a glycosylation-dependent fashion. *Journal of*  
547 *virology* **73**, 6104 (Jul, 1999).
- 548 12. I. Gutsche *et al.*, Secreted dengue virus nonstructural protein NS1 is an atypical barrel-  
549 shaped high-density lipoprotein. *Proceedings of the National Academy of Sciences of the*  
550 *United States of America* **108**, 8003 (May 10, 2011).
- 551 13. M. Flamand *et al.*, Nonstructural protein NS1 as a novel therapeutic target against  
552 flaviviruses: Use of inhibiting molecules interfering with NS1 maturation or biological  
553 activity. *Int. Patent* WO 2009/106986 A2 (Sept 3, 2009).
- 554 14. P. R. Beatty *et al.*, Dengue virus NS1 triggers endothelial permeability and vascular leak  
555 that is prevented by NS1 vaccination. *Sci Transl Med* **7**, 304ra141 (Sep 9, 2015).
- 556 15. N. Modhiran *et al.*, Dengue virus NS1 protein activates immune cells via TLR4 but not  
557 TLR2 or TLR6. *Immunol Cell Biol* **95**, 491 (May, 2017).
- 558 16. N. Modhiran *et al.*, Dengue virus NS1 protein activates cells via Toll-like receptor 4 and  
559 disrupts endothelial cell monolayer integrity. *Sci Transl Med* **7**, 304ra142 (Sep 9, 2015).
- 560 17. H. Puerta-Guardo *et al.*, Flavivirus NS1 Triggers Tissue-Specific Vascular Endothelial  
561 Dysfunction Reflecting Disease Tropism. *Cell Rep* **26**, 1598 (Feb 5, 2019).
- 562 18. H. Puerta-Guardo, D. R. Glasner, E. Harris, Dengue Virus NS1 Disrupts the Endothelial  
563 Glycocalyx, Leading to Hyperpermeability. *PLoS pathogens* **12**, e1005738 (Jul, 2016).
- 564 19. A. C. Brault *et al.*, A Zika Vaccine Targeting NS1 Protein Protects Immunocompetent  
565 Adult Mice in a Lethal Challenge Model. *Sci Rep* **7**, 14769 (Nov 7, 2017).
- 566 20. D. A. Espinosa *et al.*, Cyclic Dinucleotide-Adjuvanted Dengue Virus Nonstructural  
567 Protein 1 Induces Protective Antibody and T Cell Responses. *J Immunol* **202**, 1153 (Feb  
568 15, 2019).

- 569 21. J. J. Schlesinger, M. W. Brandriss, E. E. Walsh, Protection of mice against dengue 2 virus  
570 encephalitis by immunization with the dengue 2 virus nonstructural glycoprotein NS1. *J*  
571 *Gen Virol* **68**, 853 (1987).
- 572 22. J. J. Schlesinger, M. W. Brandriss, E. E. Walsh, Protection against 17 D yellow fever  
573 encephalitis in mice by passive transfer of monoclonal antibodies to the nonstructural  
574 glycoprotein gp48 and by active immunization with gp48. *J Immunol* **135**, 2805 (1985).
- 575 23. A. K. Falconar, Antibody responses are generated to immunodominant ELK/KLE-type  
576 motifs on the nonstructural-1 glycoprotein during live dengue virus infections in mice  
577 and humans: implications for diagnosis, pathogenesis, and vaccine design. *Clin Vaccine*  
578 *Immunol* **14**, 493 (May, 2007).
- 579 24. D. Jayathilaka *et al.*, Role of NS1 antibodies in the pathogenesis of acute secondary  
580 dengue infection. *Nat Commun* **9**, 5242 (Dec 7, 2018).
- 581 25. C. F. Lin, S. W. Wan, H. J. Cheng, H. Y. Lei, Y. S. Lin, Autoimmune pathogenesis in  
582 dengue virus infection. *Viral Immunol* **19**, 127 (Summer, 2006).
- 583 26. S. W. Lin *et al.*, Dengue virus nonstructural protein NS1 binds to prothrombin/thrombin  
584 and inhibits prothrombin activation. *J Infect*, (Nov 25, 2011).
- 585 27. D. S. Sun *et al.*, Antiplatelet autoantibodies elicited by dengue virus non-structural  
586 protein 1 cause thrombocytopenia and mortality in mice. *J Thromb Haemost* **5**, 2291  
587 (Nov, 2007).
- 588 28. S. W. Wan *et al.*, Anti-dengue virus nonstructural protein 1 antibodies contribute to  
589 platelet phagocytosis by macrophages. *Thrombosis and Haemostasis* **115**, 646 (Mar,  
590 2016).

- 591 29. R. Birner-Gruenberger, M. Schittmayer, M. Holzer, G. Marsche, Understanding high-  
592 density lipoprotein function in disease: recent advances in proteomics unravel the  
593 complexity of its composition and biology. *Progress in lipid research* **56**, 36 (Oct, 2014).
- 594 30. A. J. Lepedda *et al.*, Proteomic analysis of plasma-purified VLDL, LDL, and HDL  
595 fractions from atherosclerotic patients undergoing carotid endarterectomy: identification  
596 of serum amyloid A as a potential marker. *Oxid Med Cell Longev* **2013**, 385214 (2013).
- 597 31. L. Camont, M. J. Chapman, A. Kontush, Biological activities of HDL subpopulations  
598 and their relevance to cardiovascular disease. *Trends Mol Med* **17**, 594 (Oct, 2011).
- 599 32. M. D. Saemann *et al.*, The versatility of HDL: a crucial anti-inflammatory regulator.  
600 *European journal of clinical investigation* **40**, 1131 (Dec, 2010).
- 601 33. I. Ramasamy, Recent advances in physiological lipoprotein metabolism. *Clin Chem Lab*  
602 *Med* **52**, 1695 (Dec, 2014).
- 603 34. K. R. Feingold, C. Grunfeld, in *Endotext*, K. R. Feingold *et al.*, Eds. (South Dartmouth  
604 (MA), 2000).
- 605 35. M. E. Lauer *et al.*, Cholesteryl ester transfer between lipoproteins does not require a  
606 ternary tunnel complex with CETP. *Journal of structural biology* **194**, 191 (May, 2016).
- 607 36. L. Zhang, H. Tong, M. Garewal, G. Ren, Optimized negative-staining electron  
608 microscopy for lipoprotein studies. *Biochimica et biophysica acta* **1830**, 2150 (Jan,  
609 2013).
- 610 37. S. Jayaraman, C. Haupt, O. Gursky, Thermal transitions in serum amyloid A in solution  
611 and on the lipid: implications for structure and stability of acute-phase HDL. *Journal of*  
612 *lipid research* **56**, 1531 (Aug, 2015).

- 613 38. M. Flamand, M. Chevalier, E. Henchal, M. Girard, V. Deubel, Purification and  
614 renaturation of Japanese encephalitis virus nonstructural glycoprotein NS1 overproduced  
615 by insect cells. *Protein Expr Purif* **6**, 519 (Aug, 1995).
- 616 39. S. Green, A. Rothman, Immunopathological mechanisms in dengue and dengue  
617 hemorrhagic fever. *Curr Opin Infect Dis* **19**, 429 (Oct, 2006).
- 618 40. T. Pang, M. J. Cardoso, M. G. Guzman, Of cascades and perfect storms: the  
619 immunopathogenesis of dengue haemorrhagic fever-dengue shock syndrome  
620 (DHF/DSS). *Immunol Cell Biol* **85**, 43 (Jan, 2007).
- 621 41. S. Yacoub, J. Mongkolsapaya, G. Screaton, The pathogenesis of dengue. *Current opinion*  
622 *in infectious diseases* **26**, 284 (Jun, 2013).
- 623 42. J. Fink, F. Gu, S. G. Vasudevan, Role of T cells, cytokines and antibody in dengue fever  
624 and dengue haemorrhagic fever. *Rev Med Virol* **16**, 263 (Jul-Aug, 2006).
- 625 43. S. Alcon *et al.*, Enzyme-linked immunosorbent assay specific to Dengue virus type 1  
626 nonstructural protein NS1 reveals circulation of the antigen in the blood during the acute  
627 phase of disease in patients experiencing primary or secondary infections. *Journal of*  
628 *Clinical Microbiology* **40**, 376 (Feb, 2002).
- 629 44. P. Dussart *et al.*, Evaluation of an enzyme immunoassay for detection of dengue virus  
630 NS1 antigen in human serum. *Clinical and vaccine immunology : CVI* **13**, 1185 (Nov,  
631 2006).
- 632 45. A. D. Marais, Apolipoprotein E in lipoprotein metabolism, health and cardiovascular  
633 disease. *Pathology* **51**, 165 (Feb, 2019).
- 634 46. X. Su, D. Peng, The exchangeable apolipoproteins in lipid metabolism and obesity. *Clin*  
635 *Chim Acta* **503**, 128 (Apr, 2020).

- 636 47. S. Alcon-LePoder *et al.*, Secretion of flaviviral non-structural protein NS1: from  
637 diagnosis to pathogenesis. *Novartis Foundation symposium* **277**, 233 (2006).
- 638 48. P. Antunes *et al.*, Quantification of NS1 dengue biomarker in serum via optomagnetic  
639 nanocluster detection. *Sci Rep* **5**, 16145 (Nov 5, 2015).
- 640 49. D. H. Libraty *et al.*, High circulating levels of the dengue virus nonstructural protein NS1  
641 early in dengue illness correlate with the development of dengue hemorrhagic fever. *J*  
642 *Infect Dis* **186**, 1165 (2002).
- 643 50. B. Shao, J. W. Heinecke, Quantifying HDL proteins by mass spectrometry: how many  
644 proteins are there and what are their functions? *Expert Rev Proteomics* **15**, 31 (Jan, 2018).
- 645 51. P. Avirutnan *et al.*, Vascular leakage in severe dengue virus infections: a potential role  
646 for the nonstructural viral protein NS1 and complement. *J Infect Dis* **193**, 1078 (Apr 15,  
647 2006).
- 648 52. W. E. Brandt, R. D. Cardiff, P. K. Russell, Dengue virions and antigens in brain and  
649 serum of infected mice. *J. Virol.* **6**, 500 (1970).
- 650 53. K. M. Chung *et al.*, West Nile virus nonstructural protein NS1 inhibits complement  
651 activation by binding the regulatory protein factor H. *Proc Natl Acad Sci U S A* **103**,  
652 19111 (Dec 12, 2006).
- 653 54. T. Kurosu, P. Chaichana, M. Yamate, S. Anantapreecha, K. Ikuta, Secreted complement  
654 regulatory protein clusterin interacts with dengue virus nonstructural protein 1. *Biochem*  
655 *Biophys Res Commun* **362**, 1051 (Nov 3, 2007).
- 656 55. J. N. Conde *et al.*, Inhibition of the Membrane Attack Complex by Dengue Virus NS1  
657 through Interaction with Vitronectin and Terminal Complement Proteins. *Journal of*  
658 *virology* **90**, 9570 (Nov 1, 2016).

- 659 56. F. Alayli, F. Scholle, Dengue virus NS1 enhances viral replication and pro-inflammatory  
660 cytokine production in human dendritic cells. *Virology* **496**, 227 (Sep, 2016).
- 661 57. J. Chen, M. M. Ng, J. J. Chu, Activation of TLR2 and TLR6 by Dengue NS1 Protein and  
662 Its Implications in the Immunopathogenesis of Dengue Virus Infection. *PLoS pathogens*  
663 **11**, e1005053 (Jul, 2015).
- 664 58. G. Marsche, M. D. Saemann, A. Heinemann, M. Holzer, Inflammation alters HDL  
665 composition and function: implications for HDL-raising therapies. *Pharmacology &*  
666 *therapeutics* **137**, 341 (Mar, 2013).
- 667 59. O. Murch, M. Collin, C. J. Hinds, C. Thiemermann, Lipoproteins in inflammation and  
668 sepsis. I. Basic science. *Intensive Care Med* **33**, 13 (Jan, 2007).
- 669 60. C. Kopecky, G. Michlits, M. D. Saemann, T. Weichhart, Pro- versus Anti-inflammatory  
670 Actions of HDLs in Innate Immunity. *Cell Metab* **26**, 2 (Jul 5, 2017).
- 671 61. N. Prufer, B. Kleuser, M. van der Giet, The role of serum amyloid A and sphingosine-1-  
672 phosphate on high-density lipoprotein functionality. *Biological chemistry* **396**, 573 (Jun,  
673 2015).
- 674 62. A. Wu, C. J. Hinds, C. Thiemermann, High-density lipoproteins in sepsis and septic  
675 shock: metabolism, actions, and therapeutic applications. *Shock* **21**, 210 (Mar, 2004).
- 676 63. B. E. Dewi, T. Takasaki, I. Kurane, In vitro assessment of human endothelial cell  
677 permeability: effects of inflammatory cytokines and dengue virus infection. *Journal of*  
678 *virological methods* **121**, 171 (Nov, 2004).
- 679 64. J. Huang *et al.*, Serum Cytokine Profiles in Patients with Dengue Fever at the Acute  
680 Infection Phase. *Dis Markers* **2018**, 8403937 (2018).

- 681 65. Y. H. Lee, W. Y. Leong, A. Wilder-Smith, Markers of dengue severity: a systematic  
682 review of cytokines and chemokines. *The Journal of general virology* **97**, 3103 (Dec,  
683 2016).
- 684 66. A. Rathakrishnan *et al.*, Cytokine expression profile of dengue patients at different phases  
685 of illness. *PLoS One* **7**, e52215 (2012).
- 686 67. F. Tramontini Gomes de Sousa Cardozo *et al.*, Serum from dengue virus-infected patients  
687 with and without plasma leakage differentially affects endothelial cells barrier function  
688 in vitro. *PLoS One* **12**, e0178820 (2017).
- 689 68. K. S. Abhishek *et al.*, Association of interleukin-2, -4 and -10 with dengue severity.  
690 *Indian J Pathol Microbiol* **60**, 66 (Jan-Mar, 2017).
- 691 69. A. Srikiatkachorn, A. Mathew, A. L. Rothman, Immune-mediated cytokine storm and  
692 its role in severe dengue. *Semin Immunopathol* **39**, 563 (Jul, 2017).
- 693 70. E. C. van Gorp *et al.*, Changes in the plasma lipid profile as a potential predictor of  
694 clinical outcome in dengue hemorrhagic fever. *Clin Infect Dis* **34**, 1150 (Apr 15, 2002).
- 695 71. E. Barrientos-Arenas *et al.*, [Modulation of high-density lipoprotein and cytokine IL-  
696 1beta and IL-6 levels in patients with dengue]. *Rev Peru Med Exp Salud Publica* **35**, 15  
697 (Jan-Mar, 2018).
- 698 72. J. C. Suvarna, P. P. Rane, Serum lipid profile: a predictor of clinical outcome in dengue  
699 infection. *Trop Med Int Health* **14**, 576 (Feb 27, 2009).
- 700 73. H. H. Biswas *et al.*, Lower Low-Density Lipoprotein Cholesterol Levels Are Associated  
701 with Severe Dengue Outcome. *PLoS neglected tropical diseases* **9**, e0003904 (2015).
- 702 74. D. Marin-Palma, C. M. Sirois, S. Urcuqui-Inchima, J. C. Hernandez, Inflammatory status  
703 and severity of disease in dengue patients are associated with lipoprotein alterations.  
704 *PLoS One* **14**, e0214245 (2019).

- 705 75. W. G. Lima, N. A. Souza, S. O. A. Fernandes, V. N. Cardoso, I. P. Godoi, Serum lipid  
706 profile as a predictor of dengue severity: A systematic review and meta-analysis. *Reviews*  
707 *in medical virology* **29**, e2056 (Sep, 2019).
- 708 76. S. Filou *et al.*, Distinct Roles of Apolipoproteins A1 and E in the Modulation of High-  
709 Density Lipoprotein Composition and Function. *Biochemistry* **55**, 3752 (Jul 12, 2016).
- 710 77. E. K. Valanti, K. Dalakoura-Karagkouni, D. Sanoudou, Current and Emerging  
711 Reconstituted HDL-apoA-I and HDL-apoE Approaches to Treat Atherosclerosis. *J Pers*  
712 *Med* **8**, (Oct 3, 2018).
- 713 78. D. C. Tiga-Loza *et al.*, Persistence of symptoms in dengue patients: a clinical cohort  
714 study. *Transactions of the Royal Society of Tropical Medicine and Hygiene*, (Mar 3,  
715 2020).
- 716 79. L. A. S. Teixeira, F. Nogueira, G. A. N. Nascentes, Prospective study of patients with  
717 persistent symptoms of dengue in Brazil. *Rev Inst Med Trop Sao Paulo* **59**, e65 (Sep 4,  
718 2017).
- 719 80. L. L. Luengas, D. C. Tiga, V. M. Herrera, L. A. Villar-Centeno, Characterization of the  
720 health condition of people convalescing from a dengue episode. *Biomedica* **36**, 89 (Dec  
721 7, 2015).
- 722 81. E. S. Halsey *et al.*, Occurrence and correlates of symptom persistence following acute  
723 dengue fever in Peru. *The American journal of tropical medicine and hygiene* **90**, 449  
724 (Mar, 2014).
- 725 82. P. H. Brown, P. Schuck, Macromolecular size-and-shape distributions by sedimentation  
726 velocity analytical ultracentrifugation. *Biophysical journal* **90**, 4651 (Jun 15, 2006).



- 727 83. J. A. Velazquez-Muriel, C. O. Sorzano, S. H. Scheres, J. M. Carazo, SPI-EM: towards a  
728 tool for predicting CATH superfamilies in 3D-EM maps. *J Mol Biol* **345**, 759 (Jan 28,  
729 2005).
- 730 84. S. H. Scheres, RELION: implementation of a Bayesian approach to cryo-EM structure  
731 determination. *Journal of structural biology* **180**, 519 (Dec, 2012).
- 732 85. A. C. Andries *et al.*, Value of Routine Dengue Diagnostic Tests in Urine and Saliva  
733 Specimens. *PLoS neglected tropical diseases* **9**, e0004100 (Sep, 2015).
- 734
- 735
- 736

Fig. 1

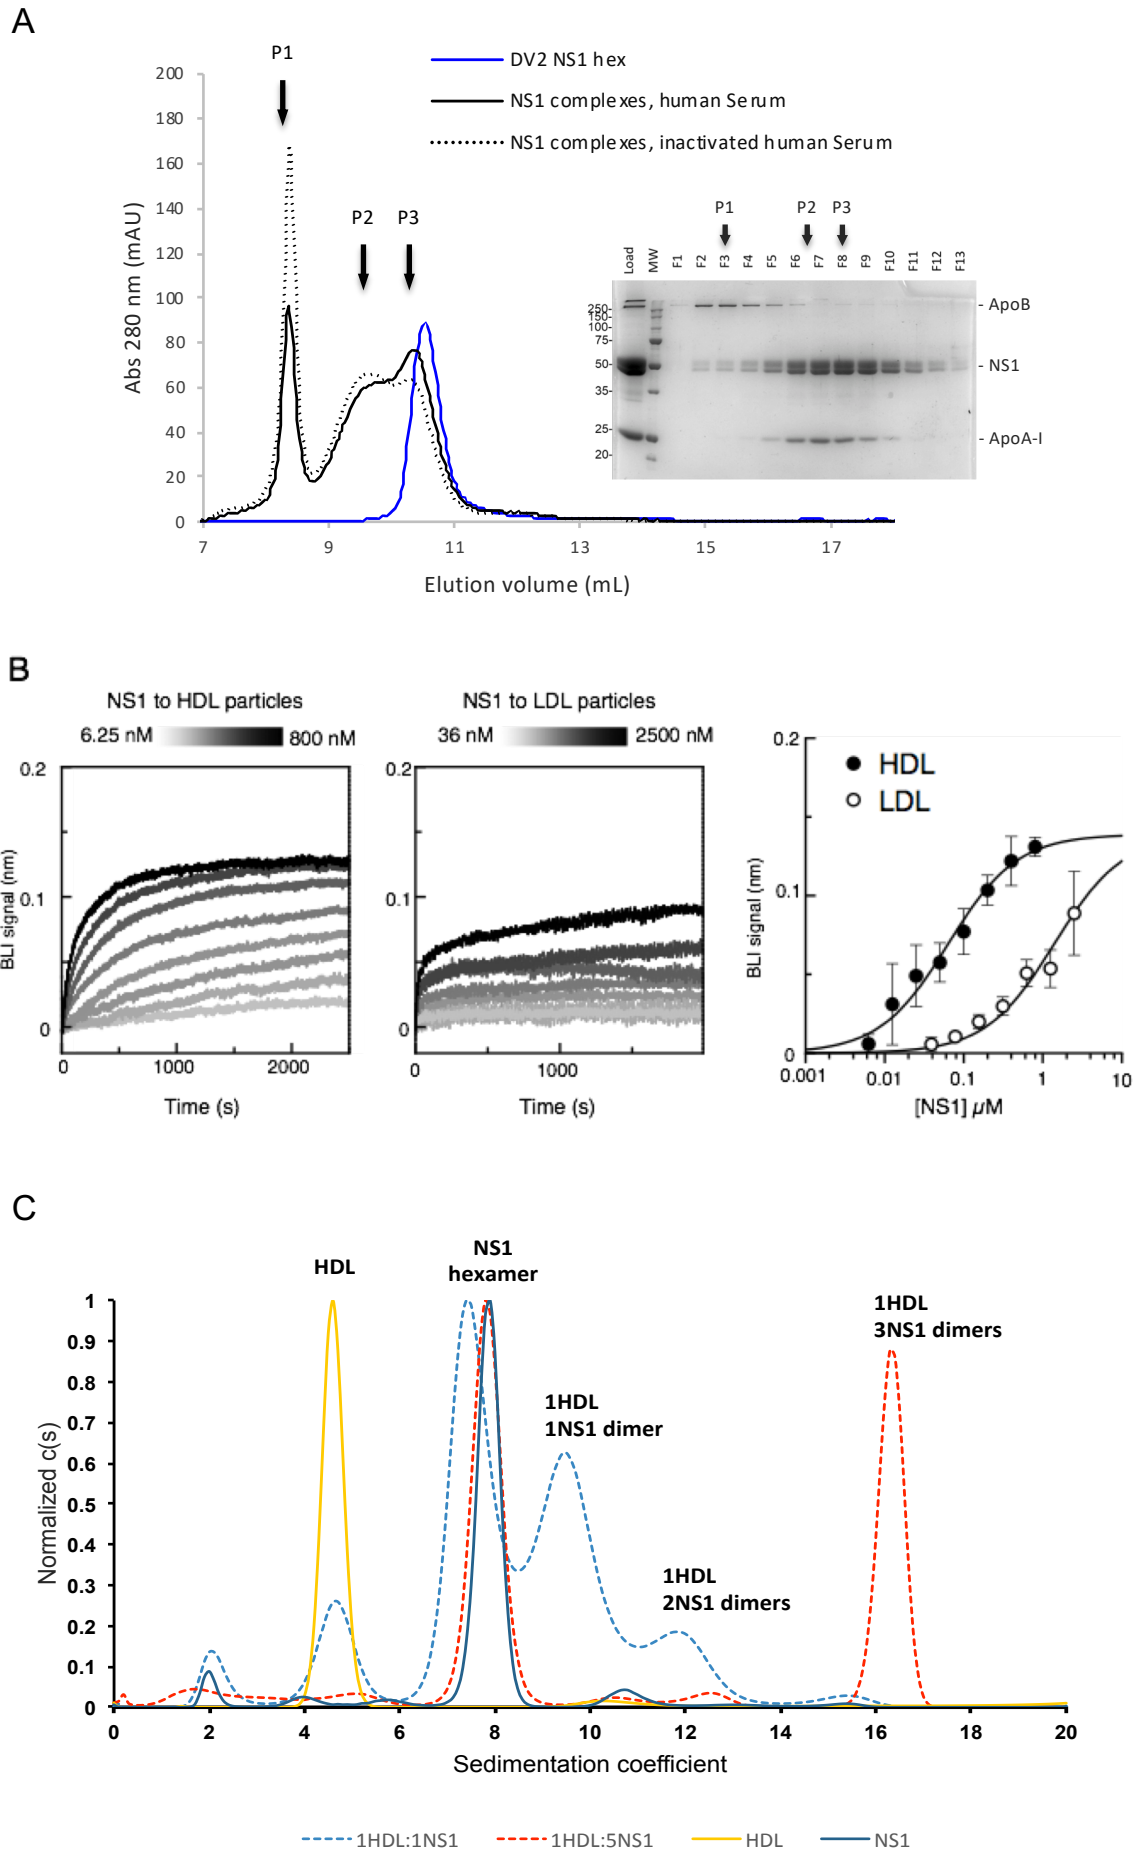

Fig. 2

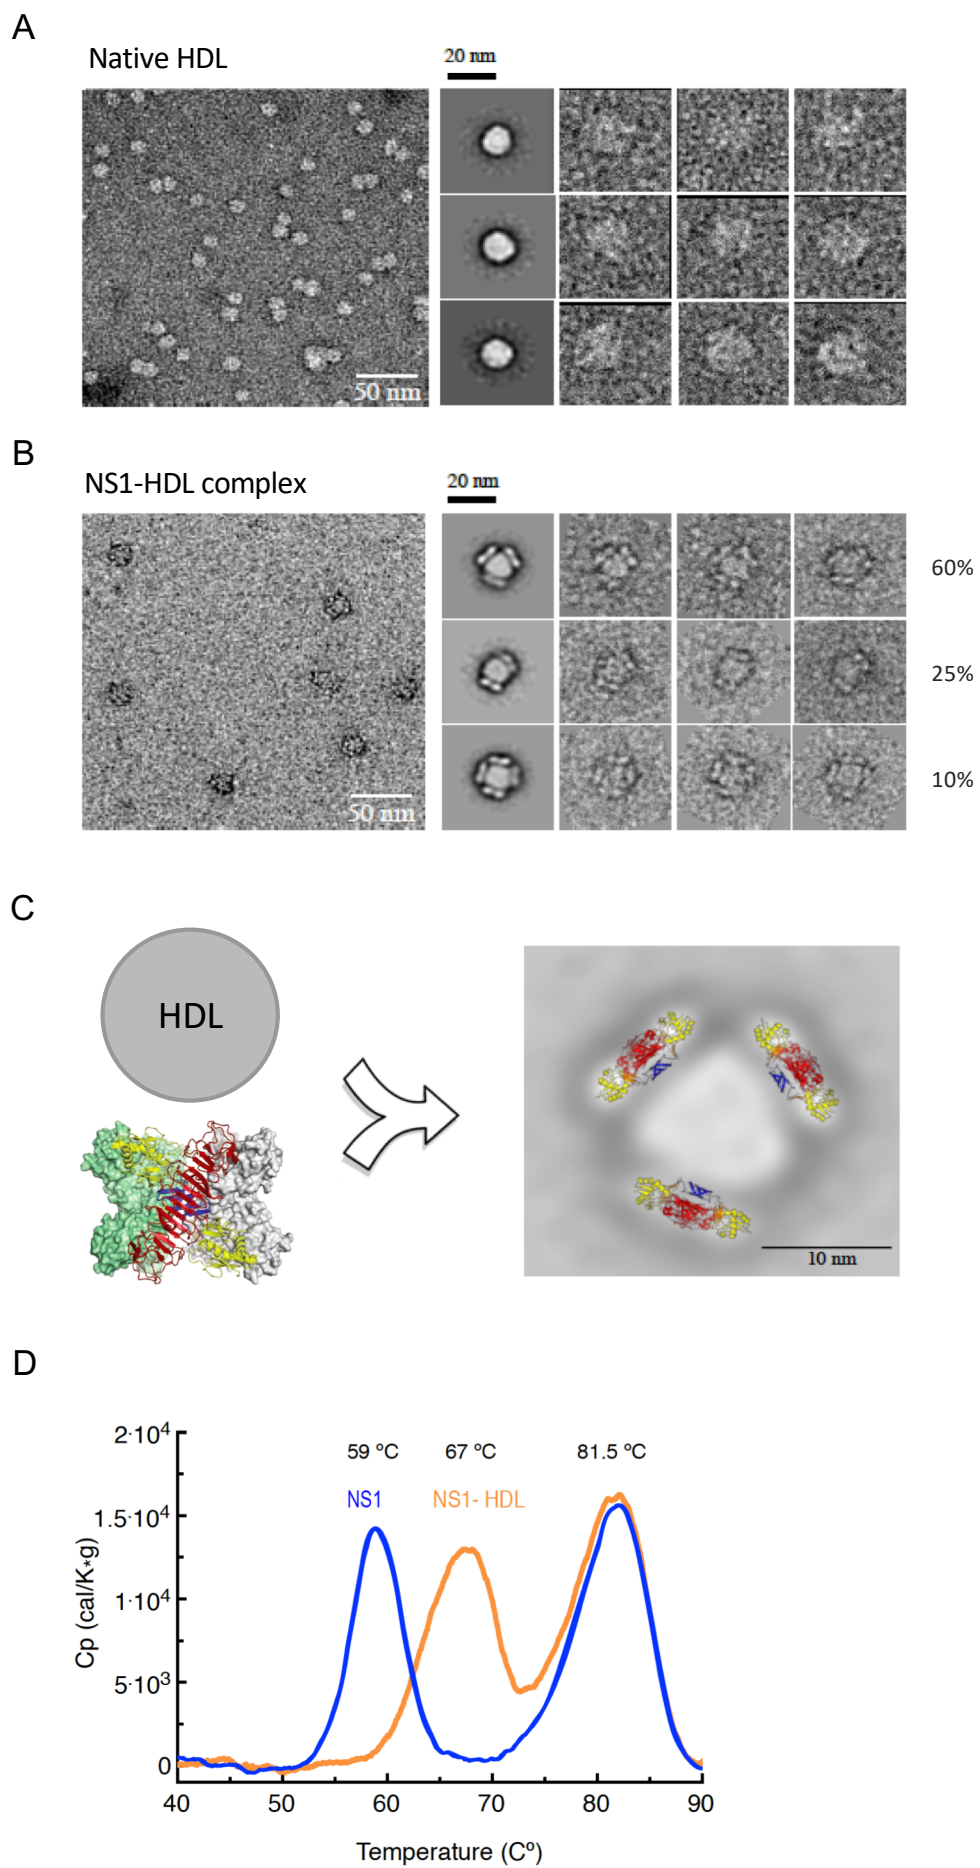

Fig. 3

A

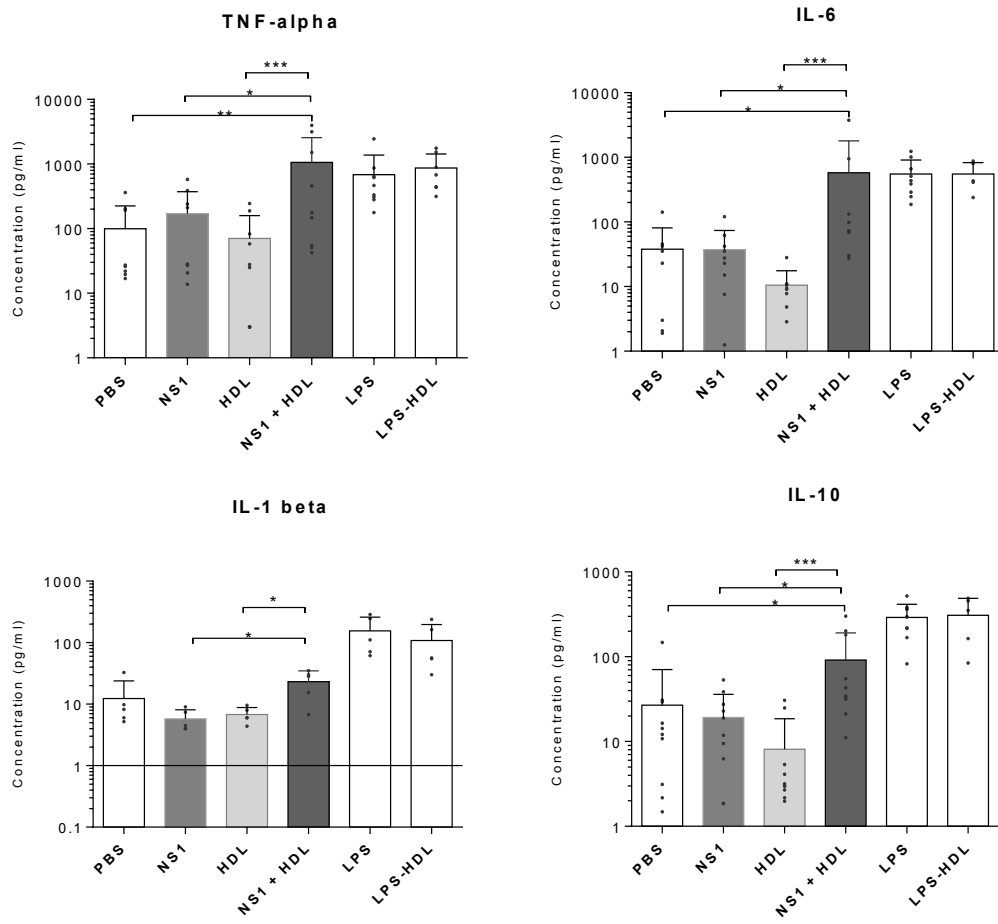

B

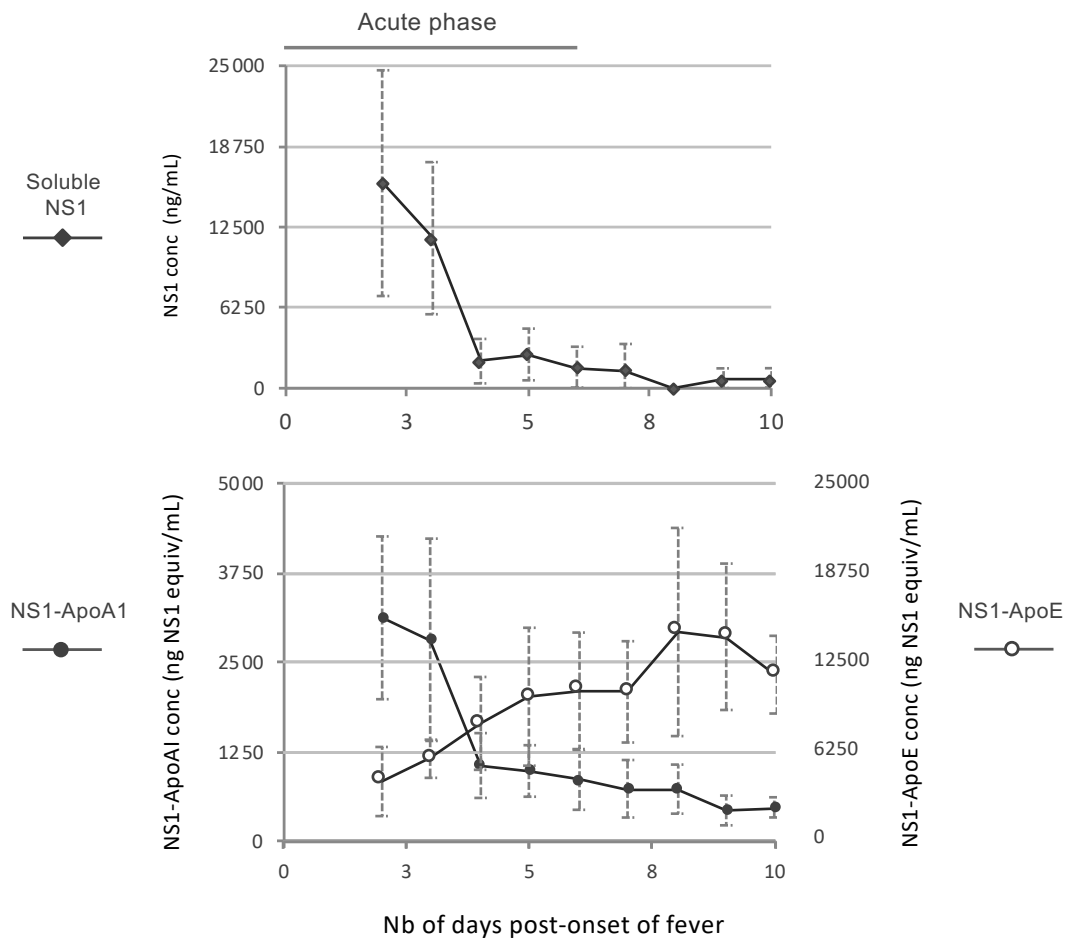

Source: https://www.biorxiv.org/content/biorxiv/early/2021/05/05/2021.05.05.442454.full.pdf
